# Supplementary material for: Methodological improvements for fluorescence recordings in Xenopus laevis oocytes
Source: PubMed Central journal article supplement (PMC6363413; doi:10.1085/jgp.201812189), 2019-02-04
Supplement: JGP_201812189_sm.pdf [file JGP_201812189_sm.pdf]

## Supplemental material

Lee and Bezanilla, <https://doi.org/10.1085/jgp.201812189>

Supplemental tables are provided as a separate PDF file.
