# Supplementary material for: Methodological improvements for fluorescence recordings in Xenopus laevis oocytes
Source: PubMed Central journal article supplement (PMC6363413; doi:10.1085/jgp.201812189), 2019-02-04
Supplement: JGP_201812189_TableS1.pdf [file JGP_201812189_TableS1.pdf]

Table S1. Fig. 1 B  
**One-way ANOVA**

|                          |         |
|--------------------------|---------|
| DoF                      | 7.92    |
| F                        | 75.36   |
| P                        | <0.0001 |
| Statistical significance | ****    |

| <b>Tukey multiple comparison test</b> | <b>Mean difference</b> | <b>95% CI of difference</b> | <b>Summary</b> |
|---------------------------------------|------------------------|-----------------------------|----------------|
| 1 vs. 2                               | 8.946                  | -10.33 to 28.22             | NS             |
| 1 vs. 3                               | 7.143                  | -13.47 to 27.75             | NS             |
| 1 vs. 4                               | 19.46                  | -2.151 to 41.08             | NS             |
| 1 vs. 5                               | 34.65                  | 14.80 to 54.51              | ****           |
| 1 vs. 6                               | 34.93                  | 11.89 to 57.97              | ***            |
| 1 vs. 7                               | 42.71                  | 19.67 to 65.76              | ****           |
| 1 vs. 8                               | 43.52                  | 23.66 to 63.38              | ****           |
| 2 vs. 3                               | -1.803                 | -21.08 to 17.47             | NS             |
| 2 vs. 4                               | 10.52                  | -9.832 to 30.87             | NS             |
| 2 vs. 5                               | 25.71                  | 7.234 to 44.18              | **             |
| 2 vs. 6                               | 25.98                  | 4.125 to 47.84              | *              |
| 2 vs. 7                               | 33.77                  | 11.91 to 55.63              | ***            |
| 2 vs. 8                               | 34.57                  | 16.10 to 53.05              | ****           |
| 3 vs. 4                               | 12.32                  | -9.294 to 33.94             | NS             |
| 3 vs. 5                               | 27.51                  | 7.652 to 47.37              | **             |
| 3 vs. 6                               | 27.79                  | 4.745 to 50.83              | **             |
| 3 vs. 7                               | 35.57                  | 12.53 to 58.61              | ***            |
| 3 vs. 8                               | 36.37                  | 16.52 to 56.23              | ****           |
| 4 vs. 5                               | 15.19                  | -5.711 to 36.09             | NS             |
| 4 vs. 6                               | 15.47                  | -8.479 to 39.41             | NS             |
| 4 vs. 7                               | 23.25                  | -0.6952 to 47.20            | NS             |
| 4 vs. 8                               | 24.05                  | 3.153 to 44.96              | *              |
| 5 vs. 6                               | 0.2757                 | -22.10 to 22.65             | NS             |
| 5 vs. 7                               | 8.06                   | -14.31 to 30.43             | NS             |
| 5 vs. 8                               | 8.864                  | -10.22 to 27.94             | NS             |
| 6 vs. 7                               | 7.784                  | -17.46 to 33.02             | NS             |
| 6 vs. 8                               | 8.588                  | -13.79 to 30.96             | NS             |
| 7 vs. 8                               | 0.8041                 | -21.57 to 23.18             | NS             |

CI, confidence interval; DoF, degrees of freedom. \*, P < 0.05; \*\*, P < 0.01; \*\*\*, P < 0.001; \*\*\*\*, P < 0.0001.

Table S2. Fig. 1 C

| <b>One-way ANOVA</b>     |  |  |          |
|--------------------------|--|--|----------|
| DoF                      |  |  | 7,39     |
| F                        |  |  | 14.18    |
| P                        |  |  | < 0.0001 |
| Statistical significance |  |  | ****     |

  

| <b>Tukey multiple comparison test</b> | <b>Mean difference</b> | <b>95% CI of difference</b> | <b>Summary</b> |
|---------------------------------------|------------------------|-----------------------------|----------------|
| 1 vs. 2                               | 277.2                  | 184.5 to 369.8              | ****           |
| 1 vs. 3                               | 292.3                  | 206.6 to 378.1              | ****           |
| 1 vs. 4                               | 299.5                  | 222.0 to 377.0              | ****           |
| 1 vs. 5                               | 404.8                  | 309.1 to 500.5              | ****           |
| 1 vs. 6                               | 439.9                  | 336.3 to 543.4              | ****           |
| 1 vs. 7                               | 566.5                  | 462.9 to 670.1              | ****           |
| 1 vs. 8                               | 601                    | 492.1 to 709.9              | ****           |
| 2 vs. 3                               | 15.17                  | -85.92 to 116.3             | NS             |
| 2 vs. 4                               | 22.3                   | -71.88 to 116.5             | NS             |
| 2 vs. 5                               | 127.6                  | 17.95 to 237.2              | *              |
| 2 vs. 6                               | 162.7                  | 46.09 to 279.3              | ***            |
| 2 vs. 7                               | 289.3                  | 172.7 to 405.9              | ****           |
| 2 vs. 8                               | 323.8                  | 202.5 to 445.1              | ****           |
| 3 vs. 4                               | 7.131                  | -80.30 to 94.56             | NS             |
| 3 vs. 5                               | 112.4                  | 8.526 to 216.3              | *              |
| 3 vs. 6                               | 147.5                  | 36.30 to 258.7              | **             |
| 3 vs. 7                               | 274.1                  | 162.9 to 385.3              | ****           |
| 3 vs. 8                               | 308.6                  | 192.5 to 424.8              | ****           |
| 4 vs. 5                               | 105.3                  | 8.105 to 202.5              | *              |
| 4 vs. 6                               | 140.4                  | 35.41 to 245.3              | **             |
| 4 vs. 7                               | 267                    | 162.0 to 372.0              | ****           |
| 4 vs. 8                               | 301.5                  | 191.3 to 411.7              | ****           |
| 5 vs. 6                               | 35.09                  | -83.92 to 154.1             | NS             |
| 5 vs. 7                               | 161.7                  | 42.69 to 280.7              | **             |
| 5 vs. 8                               | 196.2                  | 72.57 to 319.9              | ****           |
| 6 vs. 7                               | 126.6                  | 1.157 to 252.1              | *              |
| 6 vs. 8                               | 161.1                  | 31.27 to 291.0              | **             |
| 7 vs. 8                               | 34.52                  | -95.34 to 164.4             | NS             |

CI, confidence interval; DoF, degrees of freedom. \*, P < 0.05; \*\*, P < 0.01; \*\*\*, P < 0.001; \*\*\*\*, P < 0.0001.

Table S3. Fig. 2 B

| <b>One-way ANOVA</b>     |          |
|--------------------------|----------|
| DoF                      | 5,74     |
| F                        | 20.35    |
| P                        | < 0.0001 |
| Statistical significance | ****     |

| <b>Holm-Sidak multiple comparison test</b> | <b>Mean difference</b> | <b>95% CI of difference</b> | <b>Summary</b> |
|--------------------------------------------|------------------------|-----------------------------|----------------|
| Uninjected vs. DMSO injected               | -1.454                 | -137.0 to 134.1             | NS             |
| Uninjected vs. DMSO injected               | -66.43                 | -168.5 to 35.61             | NS             |
| Uninjected vs. DMSO injected               | 20.74                  | -111.5 to 153.0             | NS             |

CI, confidence interval; DoF, degrees of freedom. \*\*\*\*, P < 0.0001.

Table S4. Fig. 2 C

| <b>One-way ANOVA</b>     |         |
|--------------------------|---------|
| DoF                      | 4,87    |
| F                        | 11.17   |
| P                        | <0.0001 |
| Statistical significance | ****    |

| <b>Holm-Sidak multiple comparisons test (compared to DMSO injected)</b> | <b>Uninjected</b> | <b>10 <math>\mu</math>M HG bath</b> | <b>10 <math>\mu</math>M HG injected</b> | <b>100 <math>\mu</math>M HG injected</b> |
|-------------------------------------------------------------------------|-------------------|-------------------------------------|-----------------------------------------|------------------------------------------|
| <i>n</i>                                                                | 14                | 23                                  | 21                                      | 21                                       |
| t                                                                       | 2.183             | 4.319                               | 5.679                                   | 5.598                                    |
| Statistical significance                                                | *                 | ****                                | ****                                    | ****                                     |

CI, confidence interval; DoF, degrees of freedom; *n*, number of oocytes. \*, P < 0.05; \*\*\*\*, P < 0.0001.

Table S5. Fig. 2 D

| <b>Ordinary two-way ANOVA</b> |                             |                |                        |
|-------------------------------|-----------------------------|----------------|------------------------|
| Alpha                         | 0.05                        |                |                        |
| <b>Source of variation</b>    | <b>% of total variation</b> | <b>P value</b> | <b>P value summary</b> |
| Interaction                   | 6.148                       | 0.0141         | *                      |
| Row factor                    | 7.061                       | <0.0001        | ****                   |
| Column factor                 | 12.82                       | <0.0001        | ****                   |

| <b>Dunnett multiple comparison test</b> | <b>Mean difference</b> | <b>95% CI of difference</b> | <b>Summary</b> |
|-----------------------------------------|------------------------|-----------------------------|----------------|
| <b>Row 1</b>                            |                        |                             |                |
| Uninjected vs. DMSO injected            | 20.74                  | -11.26 to 52.75             | NS             |
| Uninjected vs. 10 $\mu$ M HG bath       | 26.73                  | -2.670 to 56.13             | NS             |
| Uninjected vs. 10 $\mu$ M HG injected   | 19.4                   | -9.642 to 48.45             | NS             |
| Uninjected vs. 100 $\mu$ M HG injected  | 30.16                  | -1.169 to 61.50             | NS             |

**Row 2**

|                                        |       |                 |    |
|----------------------------------------|-------|-----------------|----|
| Uninjected vs. DMSO injected           | 16.16 | -14.09 to 46.40 | NS |
| Uninjected vs. 10 $\mu$ M HG bath      | 3.837 | -21.83 to 29.50 | NS |
| Uninjected vs. 10 $\mu$ M HG injected  | 16.16 | -9.741 to 42.06 | NS |
| Uninjected vs. 100 $\mu$ M HG injected | 33.6  | 7.705 to 59.50  | ** |

**Row 3**

|                                        |        |                 |    |
|----------------------------------------|--------|-----------------|----|
| <b>Uninjected vs. DMSO injected</b>    | -11.75 | -43.08 to 19.59 | NS |
| Uninjected vs. 10 $\mu$ M HG bath      | 13.88  | -13.06 to 40.82 | NS |
| Uninjected vs. 10 $\mu$ M HG injected  | 31.76  | 4.592 to 58.92  | *  |
| Uninjected vs. 100 $\mu$ M HG injected | 35.41  | 8.246 to 62.57  | ** |

**Row 4**

|                                        |        |                 |    |
|----------------------------------------|--------|-----------------|----|
| Uninjected vs. DMSO injected           | -20.06 | -52.14 to 12.01 | NS |
| Uninjected vs. 10 $\mu$ M HG bath      | 18.67  | -6.998 to 44.33 | NS |
| Uninjected vs. 10 $\mu$ M HG injected  | 33     | 7.102 to 58.90  | ** |
| Uninjected vs. 100 $\mu$ M HG injected | 32.19  | 6.286 to 58.09  | ** |

CI, confidence interval. \*,  $P < 0.05$ ; \*\*,  $P < 0.01$ .

Table S6. Fig. 3 A

| <b>Unpaired two-tailed <i>t</i> test</b> |              |
|------------------------------------------|--------------|
| P value                                  | <0.0001      |
| Summary                                  | ****         |
| One- or two-tailed P value?              | Two tailed   |
| t, DoF                                   | 4.847, 34.94 |

DoF, degrees of freedom. \*\*\*\*,  $P < 0.0001$ .

Table S7. Fig. 3 B

| <b>Unpaired two-tailed <i>t</i> test</b> |              |
|------------------------------------------|--------------|
| P value                                  | <0.0001      |
| Summary                                  | ****         |
| One- or two-tailed P value?              | Two tailed   |
| t, DoF                                   | 8.731, 24.89 |

DoF, degrees of freedom. \*\*\*\*,  $P < 0.0001$ .

Table S8. Fig. 3 E

| <b>Ordinary one-way ANOVA</b> |         |
|-------------------------------|---------|
| DoF                           | 3,51    |
| F                             | 17.6    |
| P                             | <0.0001 |
| Statistical significance      | ****    |

| <b>Bonferroni multiple comparison test</b> | <b>Uninjected vs. 100 <math>\mu</math>M HG 9-91-01</b> | <b>Sh WF M356C vs. Sh WF M356C + 100 <math>\mu</math>M HG</b> |
|--------------------------------------------|--------------------------------------------------------|---------------------------------------------------------------|
| n1, n2                                     | 16, 21                                                 | 8, 10                                                         |
| P                                          | <0.0001                                                | <0.0001                                                       |
| Statistical significance                   | ****                                                   | ****                                                          |

DoF, degrees of freedom; n, number of oocytes. \*\*\*\*,  $P < 0.0001$ .

Table S9. Fig. 3 F

| <b>Unpaired two-tailed <i>t</i> test</b> |               |
|------------------------------------------|---------------|
| P value                                  | 0.5414        |
| Summary                                  | NS            |
| One- or two-tailed P value?              | Two tailed    |
| t, DoF                                   | 0.6395, 7.561 |

DoF, degrees of freedom.

Table S10. Fig. 3 G

| <b>Unpaired two-tailed <i>t</i> test</b> |              |
|------------------------------------------|--------------|
| P value                                  | 0.0324       |
| Summary                                  | *            |
| One- or two-tailed P value?              | Two tailed   |
| t, DoF                                   | 3.637, 3.183 |

DoF, degrees of freedom. \*,  $P < 0.05$ .

Table S11. Fig. 3 H

| <b>Unpaired two-tailed <i>t</i> test</b> |              |
|------------------------------------------|--------------|
| P value                                  | 0.0085       |
| Summary                                  | **           |
| One- or two-tailed P value?              | Two tailed   |
| t, DoF                                   | 3.318, 9.379 |

DoF, degrees of freedom. \*\*,  $P < 0.01$ .

Table S12. Fig. 3 I

| <b>Unpaired two-tailed <i>t</i> test</b> |              |
|------------------------------------------|--------------|
| P value                                  | 0.0011       |
| Summary                                  | **           |
| One- or two-tailed P value?              | Two tailed   |
| t, DoF                                   | 4.830, 8.400 |

DoF, degrees of freedom. \*\*,  $P < 0.01$ .

Table S13. Fig. 5 B

| <b>Ordinary two-way ANOVA</b> |                             |                |                        |
|-------------------------------|-----------------------------|----------------|------------------------|
| Alpha                         | 0.05                        |                |                        |
| <b>Source of variation</b>    | <b>% of total variation</b> | <b>P value</b> | <b>P value summary</b> |
| Interaction                   | 3.398                       | 0.0171         | *                      |
| Row factor                    | 3.763                       | 0.0009         | ***                    |
| Column factor                 | 82.38                       | <0.0001        | ****                   |

| <b>Tukey multiple comparison test</b> | <b>Mean difference</b> | <b>95% CI of difference</b> | <b>Summary</b> |
|---------------------------------------|------------------------|-----------------------------|----------------|
| <b>1</b>                              |                        |                             |                |
| Vegetal vs. animal                    | 132.2                  | 94.55 to 169.9              | ****           |
| Vegetal vs. melanin                   | 133.1                  | 95.45 to 170.8              | ****           |
| Animal vs. melanin                    | 0.9                    | -36.78 to 38.58             | NS             |
| <b>2</b>                              |                        |                             |                |
| Vegetal vs. animal                    | 98.44                  | 67.67 to 129.2              | ****           |
| Vegetal vs. melanin                   | 143.7                  | 112.9 to 174.5              | ****           |
| Animal vs. melanin                    | 45.25                  | 14.49 to 76.02              | **             |
| <b>3</b>                              |                        |                             |                |
| Vegetal vs. animal                    | 98.42                  | 74.59 to 122.2              | ****           |
| Vegetal vs. melanin                   | 105.7                  | 70.63 to 140.8              | ****           |
| Animal vs. melanin                    | 7.291                  | -27.79 to 42.37             | NS             |
| <b>4</b>                              |                        |                             |                |
| Vegetal vs. animal                    | 114.6                  | 76.88 to 152.2              | ****           |
| Vegetal vs. melanin                   | 171.7                  | 134.0 to 209.4              | ****           |
| Animal vs. melanin                    | 57.15                  | 19.47 to 94.83              | **             |

CI, confidence interval. \*, P < 0.05; \*\*, P < 0.01; \*\*\*, P < 0.001; \*\*\*\*, P < 0.0001.

Table S14. Fig. 5 C

| <b>Ordinary one-way ANOVA</b> |         |
|-------------------------------|---------|
| DoF                           | (2,9)   |
| F                             | 74.64   |
| P                             | <0.0001 |
| Statistical significance      | ****    |

| <b>Tukey multiple comparisons test</b> | <b>Mean difference</b> | <b>95% CI of difference</b> | <b>Summary</b> |
|----------------------------------------|------------------------|-----------------------------|----------------|
| Vegetal vs. animal                     | 132.2                  | 97.21 to 167.2              | ****           |
| Vegetal vs. melanin                    | 133.1                  | 98.11 to 168.1              | ****           |
| Animal vs. melanin                     | 0.9                    | -34.11 to 35.91             | NS             |

CI, confidence interval; DoF, degrees of freedom. \*\*\*\*, P < 0.0001.

Table S15. Fig. 5 D

| <b>Ordinary one-way ANOVA</b> |         |
|-------------------------------|---------|
| DoF                           | (2,9)   |
| F                             | 47.55   |
| P                             | <0.0001 |
| Statistical significance      | ****    |

| <b>Tukey multiple comparison test</b> | <b>Mean difference</b> | <b>95% CI of difference</b> | <b>Summary</b> |
|---------------------------------------|------------------------|-----------------------------|----------------|
| Vegetal vs. animal                    | 114.6                  | 64.48 to 164.6              | ****           |
| Vegetal vs. melanin                   | 171.7                  | 121.6 to 221.8              | ****           |
| Animal vs. melanin                    | 57.15                  | 7.081 to 107.2              | *              |

CI, confidence interval; DoF, degrees of freedom. \*, P < 0.05; \*\*\*\*, P < 0.0001.

Table S16. Fig. 6 C

| <b>Unpaired two-tailed <i>t</i> test</b> |            |
|------------------------------------------|------------|
| P                                        | 0.7365     |
| Summary                                  | NS         |
| Significantly different? (P < 0.05)      | No         |
| One- or two-tailed P value?              | Two tailed |
| t, DoF                                   | 0.3444, 12 |

DoF, degrees of freedom.

Table S17. Fig. 6 D

| <b>Ordinary one-way ANOVA</b> |        |
|-------------------------------|--------|
| DoF                           | (2,11) |
| F                             | 1.718  |
| P                             | 0.2243 |
| Statistical significance      | NS     |

| <b>Tukey multiple comparison test</b> | <b>Mean difference</b> | <b>95% CI of difference</b> | <b>Significant?</b> | <b>Summary</b> |
|---------------------------------------|------------------------|-----------------------------|---------------------|----------------|
| Vegetal vs. animal                    | 109.5                  | -353.9 to 572.9             | No                  | NS             |
| Vegetal vs. melanin                   | 296.9                  | -140.0 to 733.8             | No                  | NS             |
| Animal vs. melanin                    | 187.4                  | -276.0 to 650.9             | No                  | NS             |

CI, confidence interval; DoF, degrees of freedom.

Table S18. Fig. 6 E

| <b>Ordinary one-way ANOVA</b> |        |
|-------------------------------|--------|
| DoF                           | (2,11) |
| F                             | 1.414  |
| P                             | 0.2879 |
| Statistical significance      | NS     |

| <b>Tukey multiple comparison test</b> | <b>Mean difference</b> | <b>95% CI of difference</b> | <b>Significant?</b> | <b>Summary</b> |
|---------------------------------------|------------------------|-----------------------------|---------------------|----------------|
| Vegetal vs. animal                    | -12.56                 | -56.63 to 31.51             | No                  | NS             |
| Vegetal vs. melanin                   | -25.58                 | -67.39 to 16.23             | No                  | NS             |
| Animal vs. melanin                    | -13.02                 | -54.83 to 28.79             | No                  | NS             |

CI, confidence interval; DoF, degrees of freedom.

Table S19. Fig. 6 F

| Ordinary one-way ANOVA   |         |
|--------------------------|---------|
| DoF                      | (2,11)  |
| F                        | 55.36   |
| P                        | <0.0001 |
| Statistical significance | ****    |

| Tukey multiple comparison test | Mean difference | 95% CI of difference | Significant? | Summary |
|--------------------------------|-----------------|----------------------|--------------|---------|
| Vegetal vs. animal             | -2.732          | -8.677 to 3.213      | No           | NS      |
| Vegetal vs. melanin            | 17.91           | 12.30 to 23.51       | Yes          | ****    |
| Animal vs. melanin             | 20.64           | 14.70 to 26.59       | Yes          | ****    |

CI, confidence interval; DoF, degrees of freedom. \*\*\*\*,  $P < 0.0001$ .
